# Supplementary material
Source: PubMed Central journal article supplement (PMC5407722)
Supplement: ASN.2016050517SupplementaryData.pdf [file ASN.2016050517SupplementaryData.pdf]

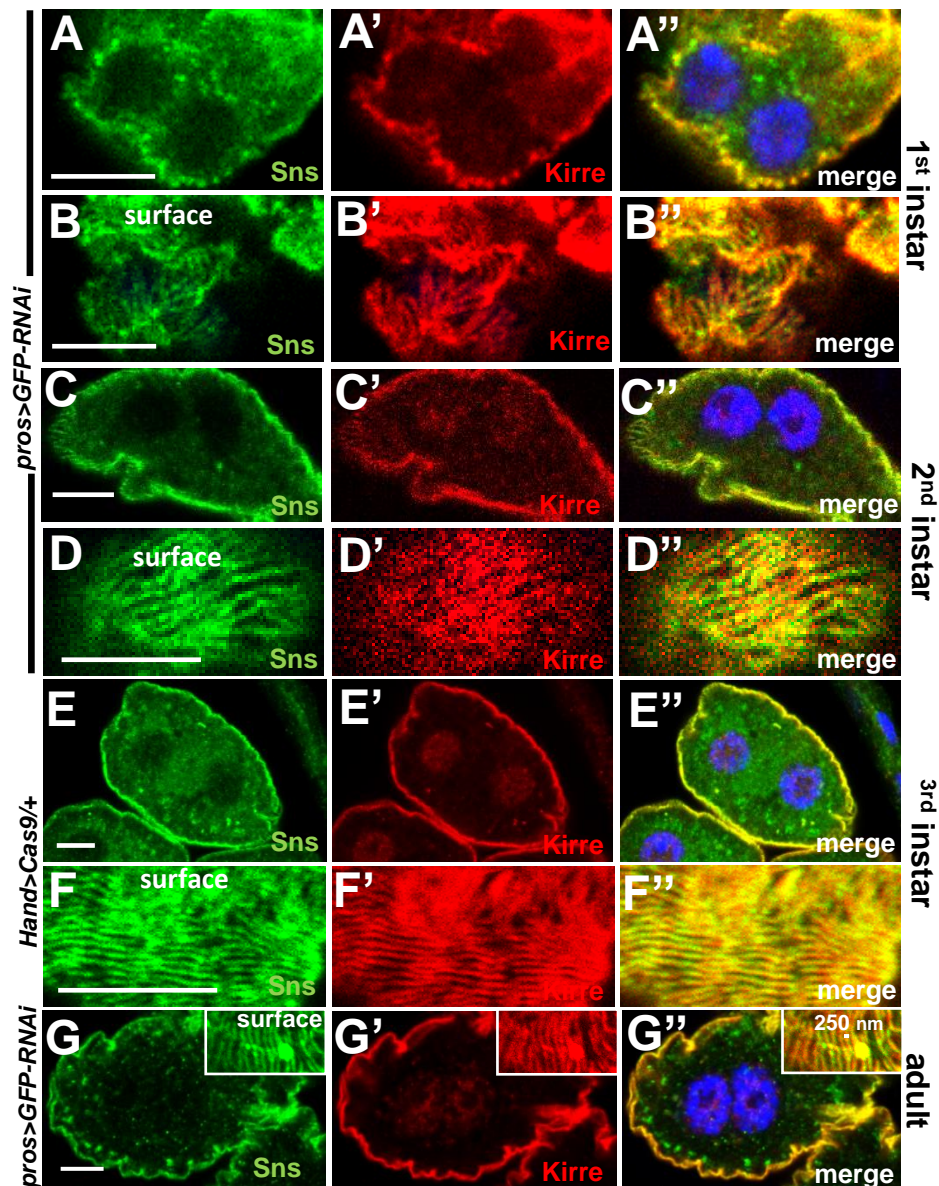

**Suppl. Fig. 1. Fingerprint-like pattern of Sns/Kirre is maintained throughout development**

**(A-B)** Control Garland nephrocyte dissected from 1<sup>st</sup> instar larva and stained for Sns/Kirre. Fingerprint-like pattern is visible as dots in cross section (A-A'') or fine lines on the surface (B-B''). Distance of lines is 250-500 nm.

**(C-D)** Control Garland nephrocyte dissected from a 2<sup>nd</sup> instar larva and stained for Sns/Kirre.

**(D)** Fingerprint-like pattern is visible like in the second instar larval stage.

**(E-F'')** GCN from 3<sup>rd</sup> instar larva with expression of Cas9 driven by *Hand*-GAL4 without expression of gRNA. Sns and Kirre localize towards the cell periphery (E) and a fingerprint-like pattern is detected in the surficial section. This genotype serves as a negative control for CRISPR/Cas9-mediated gene silencing.

**(G)** Control garland cell nephrocyte dissected from adult animal several days after eclosion. Sns and Kirre are expressed and the fingerprint pattern is maintained

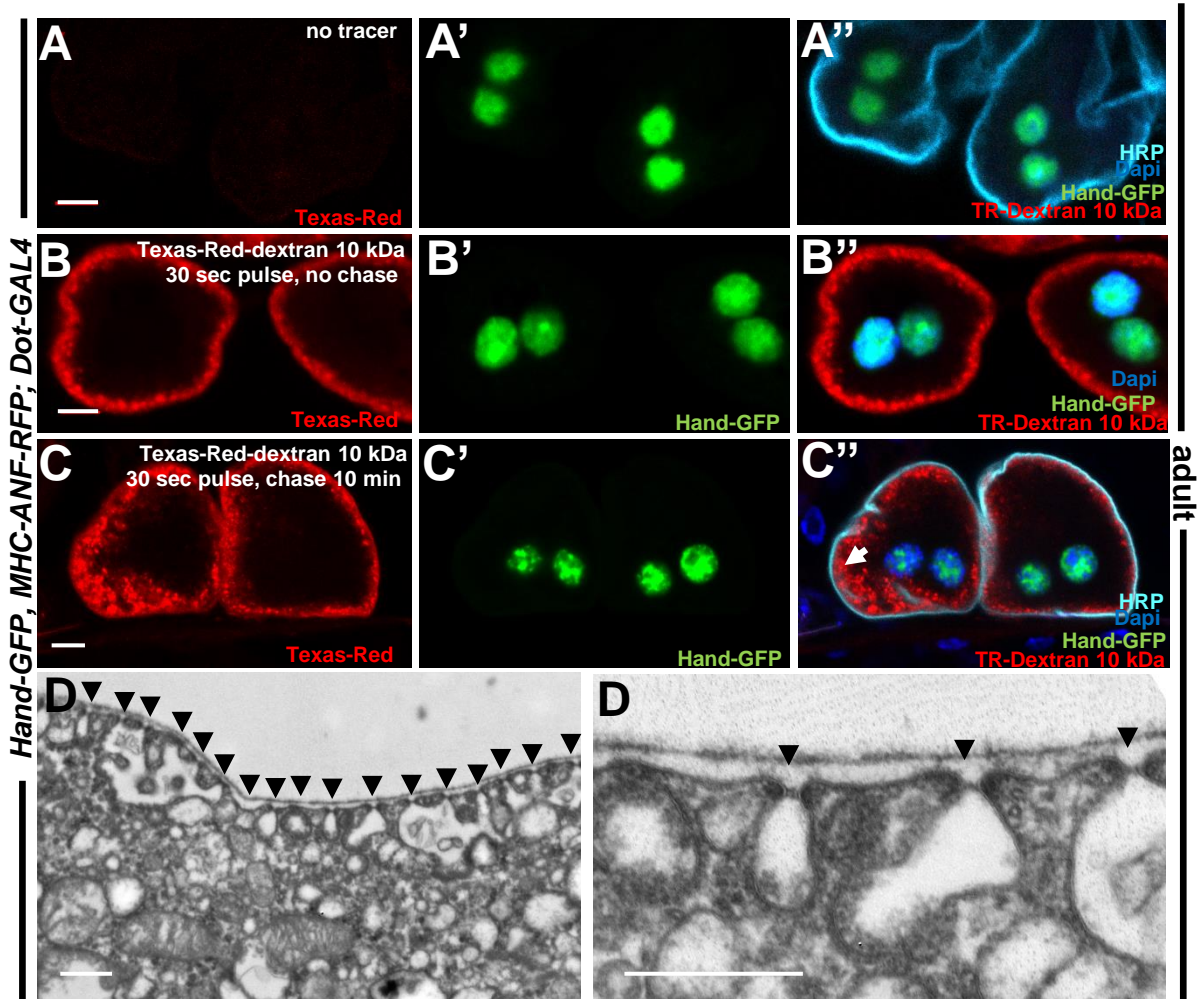

**Suppl. Fig. 2. Adult nephrocytes show tracer endocytosis**

(A-C) Control Garland nephrocyte dissected from adult animals several days after eclosion. The Hand-GFP, MHC-ANF-RFP;Dot-GAL4 is used as lack of uptake was previously described in this background. The filter set is optimized for Texas-Red but not RFP (endogenous tracer).

(A) The adult GCN are identified by Hand-GFP, HRP and two nuclei as GCN. Without tracer incubation there is no red fluorescence visible.

(B) Exposure for 30 sec to Texas-Red-dextran results in appearance of small red vesicles at the periphery of the cell. This indicates rapid tracer uptake.

(C) The same exposure as in (B) followed by 4 rinses and chasing for 10 min without tracer shows first appearance of vesicles deeper in the cell (arrow). GCN cell membrane is marked by the anti-HRP antibody.

(D) Surface detail of a GCN dissected from adult animal shows typical nephrocyte ultrastructure with slit diaphragms (black arrow heads) and labyrinthine channels.

(E) Magnification from the image in (D). Slit membranes are visible (black arrow heads) and show regular morphology compared to the larval stage (compare Fig. 1D).

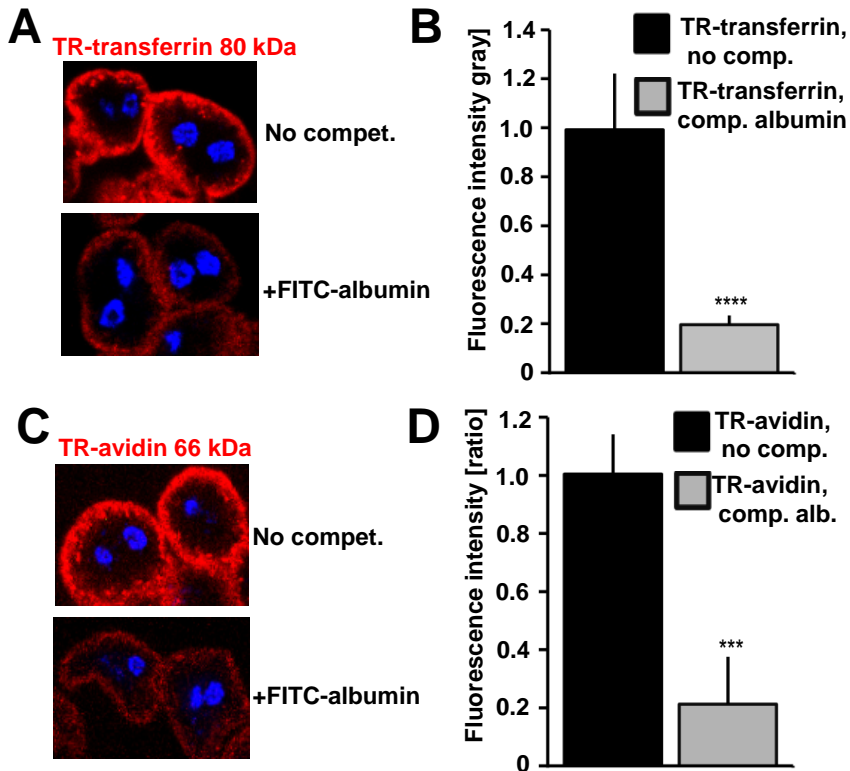

**Suppl. Fig. 3. Albumin out-competes uptake of transferrin and avidin.**

**(A)** Control Garland nephrocytes incubated for 5 min with 3  $\mu$ M Texas-Red-transferrin alone (upper panel) or in presence of an excess of 30  $\mu$ M FITC-albumin (lower panel). Uptake of Texas-Red-transferrin is strongly reduced by competition.

**(B)** Quantitation of fluorescence from (A). N=3 per intervention.

**(C)** Control Garland nephrocytes incubated for 5 min with 3  $\mu$ M Texas-Red-avidin (3  $\mu$ M) alone (upper panel) or in presence of an excess of 30  $\mu$ M FITC-albumin (lower panel). Uptake of Texas-Red-avidin is strongly reduced by competition.

**(D)** Quantitation of fluorescence from (C). N=3 per intervention.

## Supplementary Table 1. 37 genes that if mutated cause human SRNS and their *Drosophila* orthologues.

Left column indicates functional group of nephrosis genes (see Suppl. Fig.4) followed by human genes involved in the pathogenesis of nephrotic syndrome, literature reference, human accession number, and the corresponding *Drosophila* orthologue. Orthologues were identified using BLAST analysis and online tools and the number of potential orthologues was restricted to a single gene. COL4A3, ZO1 and KIRREL/NEPH1 are not published monogenic causes of SRNS in humans. They are included due to previous findings implying their relevance for podocytes and of their orthologues for nephrocytes<sup>6</sup>.

| CATEGORY                       | HUMAN GENE SYMBOL | HUMAN GENE FULL NAME                                                           | REFERENCE (1 <sup>ST</sup> AUTHOR/ YEAR) | ACCESSION NUMBER                             | DROSOPHILA ORTHOLOGUE | ORTHOLOGUE FULL NAME                 | ANNOTATION SYMBOL |
|--------------------------------|-------------------|--------------------------------------------------------------------------------|------------------------------------------|----------------------------------------------|-----------------------|--------------------------------------|-------------------|
| Silt membrane complex          | <b>NPHS1</b>      | NEPHRIN                                                                        | Kestila/1998 <sup>1</sup>                | NM_004646.3                                  | <b>sns</b>            | sticks and stones                    | CG33141           |
|                                | <b>KIRREL</b>     | KIN OF IRRE-LIKE                                                               | Donoviel/2001 <sup>2</sup>               | NM_018240.5                                  | <b>kirre</b>          | kin of irre                          | CG3653            |
|                                | <b>CD2AP</b>      | CD2-ASSOCIATED PROTEIN                                                         | Lowik/2007 <sup>3</sup>                  | NM_012120.2                                  | <b>cindr</b>          | CIN85 and CD2AP orthologue           | CG31012           |
|                                | <b>CRB2</b>       | CRUMBS, DROSOPHILA, HOMOLOG OF, 2                                              | Ebarasi/2015 <sup>4</sup>                | NM_173689.5                                  | <b>crb</b>            | crumbs                               | CG6383            |
|                                | <b>FAT1</b>       | FAT TUMOR SUPPRESSOR, DROSOPHILA, HOMOLOG OF, 1                                | Gee/2016 <sup>5</sup>                    | NM_005245.3                                  | <b>ft</b>             | fat                                  | CG3352            |
|                                | <b>NPHS2</b>      | PODOCIN                                                                        | Boute/2000 <sup>6</sup>                  | NM_014625.2                                  | <b>Mec2</b>           | Mec2                                 | CG7635            |
|                                | <b>DGKE</b>       | DIACYLGLYCEROL KINASE, EPSILON, 64-KD                                          | Ozaltin/2013 <sup>7</sup>                | NM_003647.2                                  | <b>Dgkε</b>           | Diacyl glycerol kinase ε             | CG8657            |
|                                | <b>PTPRO</b>      | PROTEIN-TYROSINE PHOSPHATASE, RECEPTOR-TYPE, O                                 | Ozaltin/2011 <sup>8</sup>                | NM_030667.2                                  | <b>Ptp10D</b>         | Protein tyrosine phosphatase 10D     | CG1817            |
| ECM inter-action               | <b>TJP 1</b>      | TIGHT JUNCTION PROTEIN 1                                                       | (Huber/2003 <sup>9</sup> )               | NM_003257.4                                  | <b>pyd</b>            | polychaetoid                         | CG43140           |
|                                | <b>COL4A3</b>     | COLLAGEN, TYPE IV, ALPHA-3                                                     | (Malone/2014 <sup>10</sup> )             | NM_000091.4                                  | <b>vkg</b>            | Viking                               | CG16858           |
|                                | <b>ITGA3</b>      | INTEGRIN, ALPHA-3                                                              | Has/2012 <sup>11</sup>                   | NM_005501.2                                  | <b>mew</b>            | multiple edematous wings             | CG1771            |
| Coq <sub>10</sub>              | <b>ITGB4</b>      | INTEGRIN, BETA-4                                                               | Kambham/2000 <sup>12</sup>               | NM_000213.3                                  | <b>mys</b>            | mysospheroid                         | CG1560            |
|                                | <b>LAMB2</b>      | LAMININ, BETA-2                                                                | Zenker/2004 <sup>13</sup>                | NM_002292.3                                  | <b>LanB1</b>          | LanB1                                | CG7123            |
|                                | <b>ADCK4</b>      | AARF DOMAIN-CONTAINING KINASE 4                                                | Ashraf/2013 <sup>14</sup>                | NM_024876.3                                  | <b>CG32649</b>        | NN                                   | CG32649           |
|                                | <b>COQ2</b>       | COQ2, S. CEREVISIAE, HOMOLOG OF                                                | Diomed-Carnassei/2007 <sup>15</sup>      | NM_015697.7                                  | <b>Coq2</b>           | Coenzyme Q biosynthesis protein 2    | CG9613            |
| Actin regulation               | <b>COQ6</b>       | COQ6, S. CEREVISIAE, HOMOLOG OF                                                | Heeringa/2011 <sup>16</sup>              | NM_182476.2                                  | <b>CG7277</b>         | NN                                   | CG7277            |
|                                | <b>PDSS2</b>      | PRENYL DIPHOSPHATE SYNTHASE, SUBUNIT 2                                         | Lopez/2006 <sup>17</sup>                 | NM_020381.3                                  | <b>CG10585</b>        | NN                                   | CG10585           |
|                                | <b>ACTN4</b>      | ACTININ, ALPHA-4                                                               | Kaplan/2000 <sup>18</sup>                | NM_004924.4                                  | <b>Actn</b>           | α actinin                            | CG4376            |
| Transcriptional regulation     | <b>ANLN</b>       | ACTIN-BINDING PROTEIN ANILLIN                                                  | Gbadegesin/2014 <sup>19</sup>            | NM_018685.2                                  | <b>scra</b>           | scraps                               | CG2092            |
|                                | <b>ARHGAP24</b>   | RHO GTPase-ACTIVATING PROTEIN 24                                               | Akilesh/2011 <sup>20</sup>               | NM_001025616.2                               | <b>RhoGAP92B</b>      | Rho GTPase activating protein at 92B | CG4755            |
|                                | <b>ARHGDI</b>     | RHO GDP-DISSOCIATION INHIBITOR ALPHA                                           | Gupta/2013 <sup>21</sup>                 | NM_001185078.1                               | <b>RhoGDI</b>         | RhoGDI                               | CG7823            |
|                                | <b>INF2</b>       | INVERTED FORMIN 2                                                              | Brown/2010 <sup>22</sup>                 | NM_022489.3                                  | <b>form3</b>          | formin 3                             | CG33556           |
|                                | <b>KANK 1</b>     | KN MOTIF- AND ANKYRIN REPEAT DOMAIN-CONTAINING PROTEIN 1                       | Gee/2015 <sup>23</sup>                   | NM_001256876.1<br>NM_015493.6<br>NM_181712.4 | <b>Kank</b>           | Kank                                 | CG10249           |
|                                | <b>KANK2</b>      |                                                                                |                                          |                                              |                       |                                      |                   |
|                                | <b>KANK4</b>      |                                                                                |                                          |                                              |                       |                                      |                   |
|                                | <b>MYO1E</b>      | MYOSIN IE                                                                      | Mele/2011 <sup>24</sup>                  | NM_004998.3                                  | <b>Myo61F</b>         | Myosin 61F                           | CG9155            |
| <b>MYH9</b>                    | NONMUSCLE         | Heath/2001 <sup>25</sup>                                                       | NM_002473.4                              | <b>zip</b>                                   | zipper                | CG15792                              |                   |
| Endo-cytosis                   | <b>CUBN</b>       | CUBILIN                                                                        | Ovunc/2011 <sup>26</sup>                 | NM_001081.3                                  | <b>Cubn</b>           | Cubilin ortholog                     | CG32702           |
|                                | <b>SCARB2</b>     | SCAVENGER RECEPTOR CLASS B, MEMBER 2                                           | Berkovic/2008 <sup>27</sup>              | NM_005506.3                                  | <b>emp</b>            | epithelial membrane protein          | CG2727            |
| No orthologous gene identified | <b>SMARCAL1</b>   | ASSOCIATED, ACTIN-DEPENDENT REGULATOR OF CHROMATIN, SUBFAMILY A-LIKE PROTEIN 1 | Boerkoel/2002 <sup>28</sup>              | NM_014140.3                                  | <b>Marcal1</b>        | Marcal1                              | CG3753            |
|                                | <b>LMX1B</b>      | LIM HOMEBOX TRANSCRIPTION FACTOR 1, BETA                                       | Vollrath/1998 <sup>29</sup>              | NM_00117414.1                                | <b>CG32105</b>        | NN                                   | CG32105           |
| No orthologous gene identified | <b>PLCE1</b>      | PHOSPHOLIPASE C, EPSILON-1                                                     | Hinkes/2006 <sup>30</sup>                | NM_016341.3                                  |                       |                                      |                   |
|                                | <b>EMP2</b>       | EPITHELIAL MEMBRANE PROTEIN 2                                                  | Gee/2014 <sup>31</sup>                   | NM_001424.4                                  |                       |                                      |                   |
|                                | <b>WDR73</b>      | WD REPEAT-CONTAINING PROTEIN 73                                                | Colin/2014 <sup>32</sup>                 | NM_032856.2                                  |                       |                                      |                   |
|                                | <b>CFH</b>        | COMPLEMENT FACTOR H                                                            | Sethi/2012 <sup>33</sup>                 | NM_000186.3                                  |                       |                                      |                   |
|                                | <b>WT1</b>        | WILMS TUMOR 1                                                                  | Jeanpierre/1998 <sup>34</sup>            | NM_024426.4                                  |                       |                                      |                   |
|                                | <b>MTTL1</b>      | TRANSFER RNA, MITOCHONDRIAL, LEUCINE, 1;                                       | Yasukawa/2000 <sup>35</sup>              | NC_012920.1                                  |                       |                                      |                   |

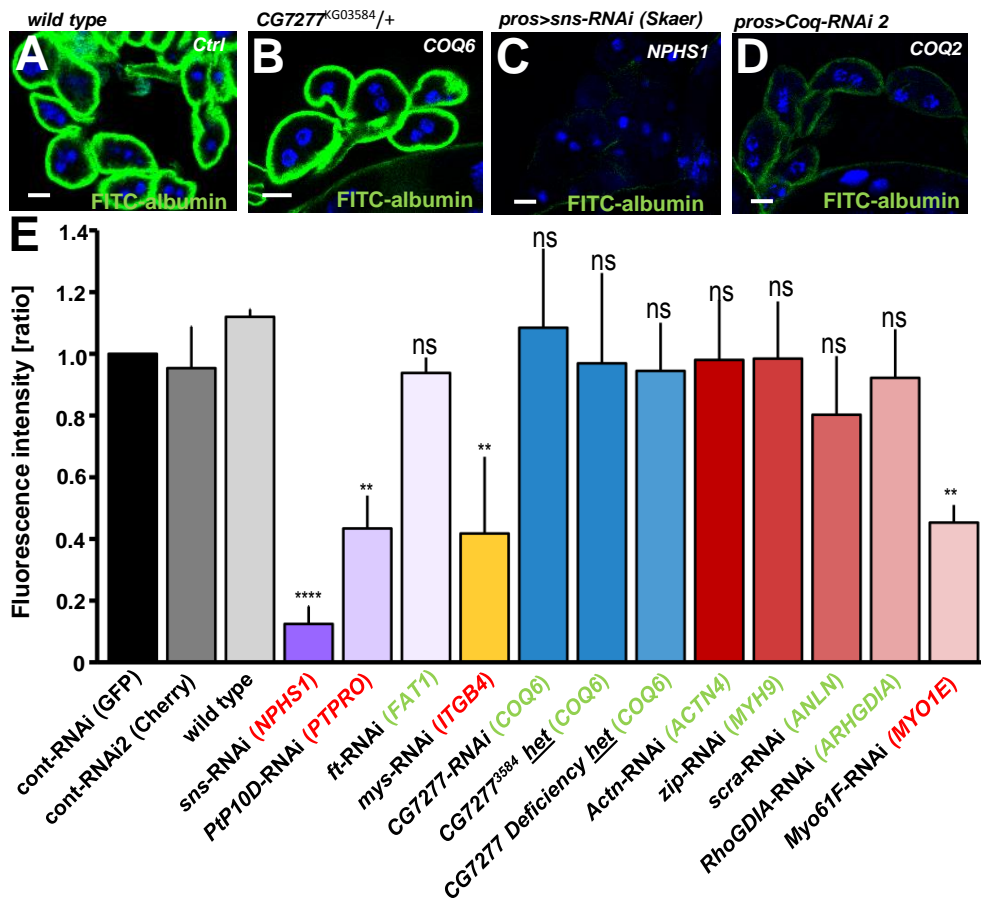

#### Suppl. Fig. 4. Additional FITC-albumin uptake experiments.

(A-D) Shown are examples FITC-albumin uptake after 30 sec exposure of wild type GCN (A) and GCN *heterozygous* for *CG7277<sup>KG03584</sup>* over a wild type chromosome (B). Robust robust FITC-albumin endocytosis can be observed in both genotypes. GCN expressing RNAi directed against *sns* (B), and a second RNAi directed against *Coq2* show reduced FITC-albumin uptake. All scale bars represent 10  $\mu$ m.

(E) Quantitation of fluorescent intensity for genotypes as indicated compared normalized to GFP-RNAi (N=3 per intervention). Human orthologue is denoted in brackets, red letters indicate significantly reduced FITC-albumin endocytosis, green letters indicate no significant effect (may diverge from the two further RNAi shown in Fig. 3). The allele and deficiency affecting the orthologue of *COQ6* are *heterozygous* over a wild type chromosome. Statistical significance was calculated using ANOVA and Dunnet's post hoc analysis.

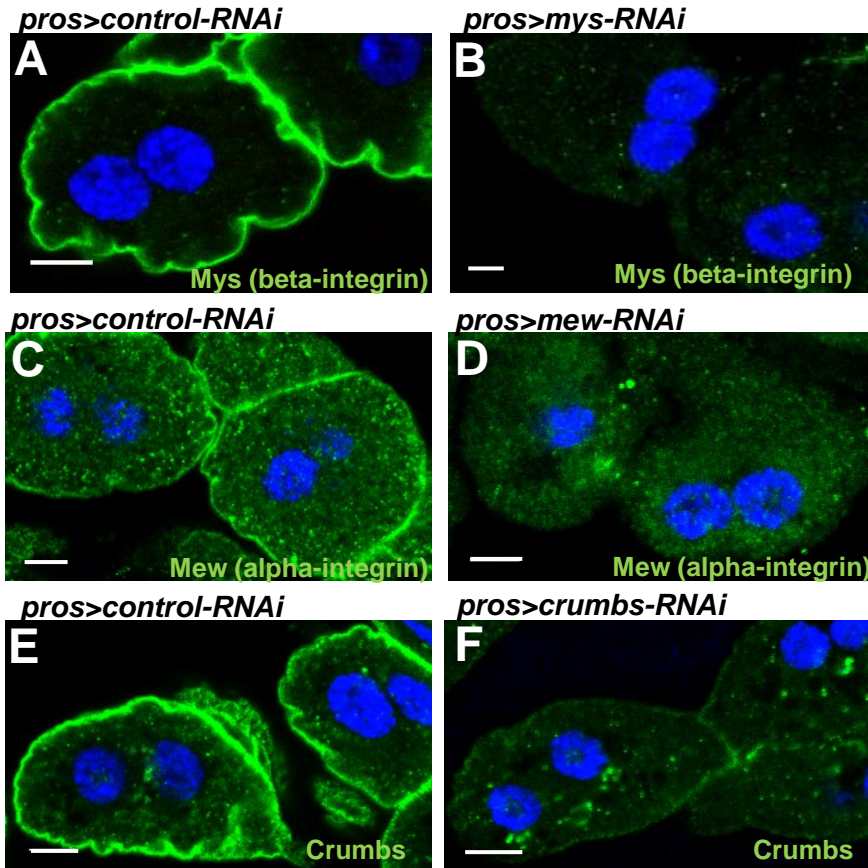

**Suppl. Fig. 5. Knock-down efficiency tested by Immunofluorescence.**

**(A-F)** All images are recorded with identical settings for control and knockdown.

**(A)** GCN expressing control RNAi stained for the orthologue of *ITGB4*.

**(B)** Silencing of the orthologue of *ITGB4* strongly reduces signal of the anti-mys antibody suggesting efficient knockdown.

**(C)** GCN expressing control RNAi stained for the orthologue of *ITGA3*.

**(D)** Silencing of the orthologue of *ITGB4* strongly reduces signal of the anti-mew antibody suggesting efficient knockdown.

**(E)** GCN expressing control RNAi stained for the orthologue of *CRB2*.

**(F)** Silencing of the orthologue of *CRB2* strongly reduces signal of the anti-crumbs antibody suggesting efficient knockdown.

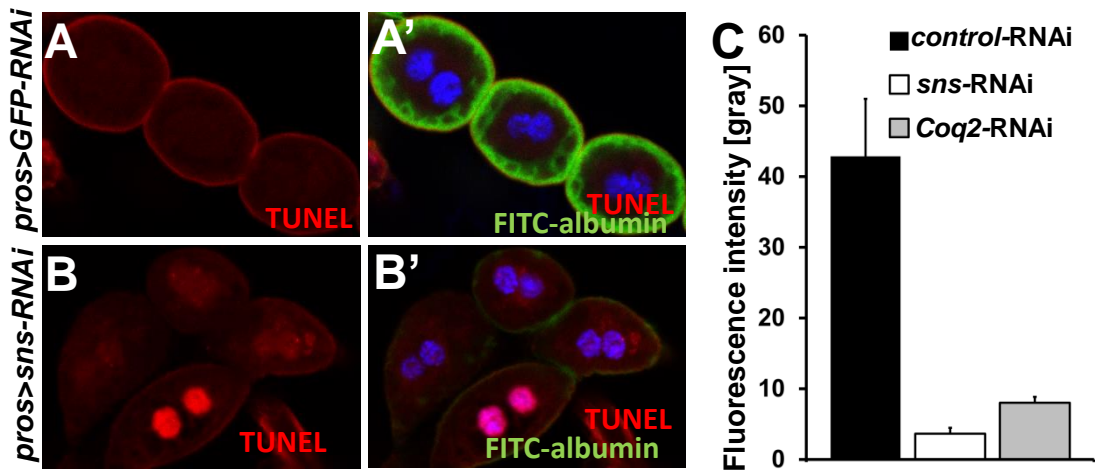

**Supplementary Fig. 6. Uptake of TUNEL-negative cells is strongly affected upon knockdown of *sns* and *Coq2*.**

(A-A') Control garland cell nephrocytes are TUNEL-negative and show strong uptake of FITC-albumin. (B-B') Silencing *sns* results in the appearance of TUNEL-positive nephrocytes like the cell below in the middle of the representative image. TUNEL-negative and TUNEL-positive cells alike show a reduced uptake of FITC-albumin. (C) Quantitation of FITC-albumin-uptake using Image J for TUNEL-negative cells expressing control-RNAi (EGFP-RNAi) or RNAs directed against *sns* or *Coq2* (N= 3 animals for each genotype).

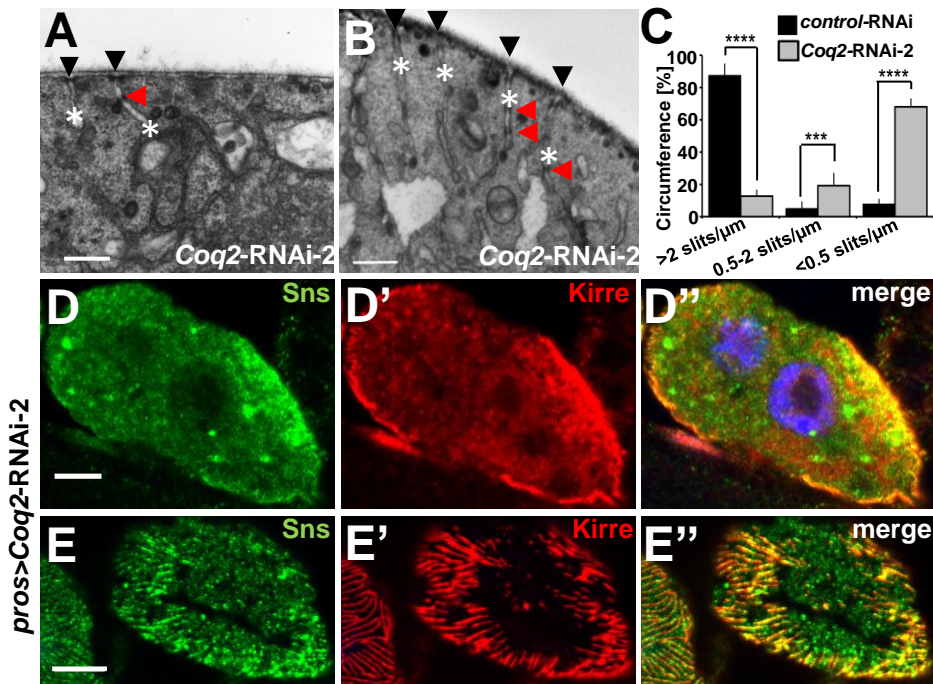

**Supplementary. Fig. 7. *Coq2*-RNAi findings are confirmed by a second RNAi-line.**

**(A-B)** EM-images of nephrocytes expressing a second *Coq2*-RNAi show reduced number of SDs (arrow heads) and labyrinthine channels (asterisks). SDs are often mislocalized into the labyrinthine channels and multiplied (red arrow heads).

**(C)** Quantitation of frequency of SD measured along one complete GNC diameter for control-RNAi compared to *Coq2*-RNAi as mean of 6 cells from 3 different animals. Frequency of SDs was classified into three groups: normal (>2 slits/ $\mu\text{m}$ ), reduced (0.5-2 slits/ $\mu\text{m}$ ) and sporadic (<0.5 slits/ $\mu\text{m}$ ). Note the strong reduction of SDs in *Coq2*-RNAi.

**(D-D'')** Immunostaining of Sns/Kirre in Garlands expressing *Coq2*-RNAi2 reveals gaps and partial misplacement of Sns/Kirre from the membrane.

**(E-E'')** Surface section of nephrocyte expressing *Coq2*-RNAi 2 shows gaps of Sns/Kirre on the surface.

All Scale bars represent 500 nm in electron microscopy images and 5  $\mu\text{m}$  in confocal images.



## Supplementary Table 2. Drosophila RNAi lines used in this study.

Drosophila stocks were obtained from from Vienna Drosophila Drosophila Resource Center (VDRC) or Bloomington Drosophila Stock Center at Indiana University (BDSC) unless otherwise indicated. Source ID is noted as Transformant ID (VDRC) or stock number (BDSC). Uptake is denoted as percent of uptake compared to control (GFP-RNAi).

| stock name                     | CG #    | source   | source ID# | uptake [%] |
|--------------------------------|---------|----------|------------|------------|
| UAS-EGFP-RNAi                  | -       | BDSC     | 41553      | 100        |
| UAS-mCherry-RNAi               | -       | BDSC     | 35785      | 95         |
| UAS-sns-RNAi                   | CG33141 | VDRC     | 109442     | 10         |
| UAS-sns-RNAi                   | CG33141 | BDSC     | 64872      | 12         |
| UAS-sns-RNAi                   | CG33141 | H. Skaer | -          | 7          |
| UAS-kirre-RNAi                 | CG3653  | VDRC     | 27227      | 8          |
| UAS-kirre-RNAi                 | CG3653  | VDRC     | 109585     | 17         |
| UAS-pyd-RNAi                   | CG43140 | BDSC     | 35225      | 14         |
| UAS-pyd-RNAi                   | CG43140 | BDSC     | 33386      | 13         |
| UAS-Mec2-RNAi                  | CG7635  | VDRC     | 104601     | 57         |
| UAS-Mec2-RNAi                  | CG7635  | BDSC     | 61259      | 54         |
| UAS-Cindr-RNAi                 | CG31012 | BDSC     | 38328      | 47         |
| UAS-Cindr-RNAi                 | CG31012 | BDSC     | 38976      | 54         |
| UAS-crb-RNAi                   | CG6383  | BDSC     | 40869      | 66         |
| UAS-crb-RNAi                   | CG6383  | BDSC     | 34999      | 78         |
| UAS-Ptp10D-RNAi                | CG1817  | VDRC     | 110443     | 43         |
| UAS-Ptp10D-RNAi                | CG1817  | BDSC     | 39001      | 93         |
| UAS-Ptp10D-RNAi                | CG1817  | VDRC     | 1101       | 76         |
| UAS-Dgke-RNAi                  | CG8657  | VDRC     | 4659       | 75         |
| UAS-Dgke-RNAi                  | CG8657  | BDSC     | 57750      | 83         |
| UAS-ft-RNAi                    | CG3352  | VDRC     | 108863     | 81         |
| UAS-ft-RNAi                    | CG3352  | BDSC     | 34970      | 92         |
| UAS-ft-RNAi                    | CG3352  | VDRC     | 9396       | 94         |
| UAS-LanB1-RNAi                 | CG7123  | VDRC     | 23121      | 14         |
| UAS-LanB1-RNAi                 | CG7123  | BDSC     | 42616      | 71         |
| UAS-mys-RNAi                   | CG1560  | BDSC     | 33642      | 51         |
| UAS-mys-RNAi                   | CG1560  | VDRC     | 29619      | 19         |
| UAS-mys-RNAi                   | CG1560  | BDSC     | 27735      | 42         |
| UAS-mew-RNAi                   | CG1771  | BDSC     | 44553      | 47         |
| UAS-mew-RNAi                   | CG1771  | BDSC     | 27543      | 54         |
| UAS-vkg-RNAi                   | CG16858 | BDSC     | 50895      | 57         |
| UAS-vkg-RNAi                   | CG16858 | VDRC     | 106812     | 47         |
| UAS-Cog2-RNAi                  | CG9613  | BDSC     | 27054      | 13         |
| UAS-Cog2-RNAi (2)              | CG9613  | VDRC     | 108373     | 34         |
| UAS-CG32649-RNAi               | CG32649 | VDRC     | 110801     | 12         |
| UAS-CG32649-RNAi               | CG32649 | BDSC     | 57039      | 46         |
| UAS-CG7277-RNAi                | CG7277  | VDRC     | 30693      | 108        |
| CG7277 <sup>KG03584</sup> /Def | CG7277  | BDSC     | 13964/9602 | 53         |
| CG7277 <sup>KG03584</sup> hom  | CG7277  | BDSC     | 13964      | 31         |
| CG7277 <sup>KG03584</sup> +    | CG7277  | BDSC     | 13964      | 97         |
| CG7277 Deficiency/+            | CG7277  | BDSC     | 9602       | 94         |
| UAS-CG10585-RNAi               | CG10585 | VDRC     | 110196     | 69         |
| UAS-CG10585-RNAi               | CG10585 | BDSC     | 51910      | 104        |
| UAS-RhoGAP92B-RNAi             | CG4755  | VDRC     | 105663     | 45         |
| UAS-RhoGAP92B-RNAi             | CG4755  | BDSC     | 33391      | 55         |
| UAS-Kank-RNAi                  | CG10249 | BDSC     | 33432      | 69         |
| UAS-Kank-RNAi                  | CG10249 | VDRC     | 15009      | 53         |
| UAS-scra-RNAi                  | CG2092  | VDRC     | 104674     | 80         |
| UAS-scra-RNAi                  | CG2092  | BDSC     | 53358      | 39         |
| UAS-scra-RNAi                  | CG2092  | VDRC     | 33465      | 59         |
| UAS-RhoGDI-RNAi                | CG7823  | VDRC     | 105765     | 94         |
| UAS-RhoGDI-RNAi                | CG7823  | VDRC     | 46154      | 76         |
| UAS-RhoGDI-RNAi                | CG7823  | BDSC     | 40902      | 92         |
| UAS-zjp-RNAi                   | CG3533  | VDRC     | 104208     | 98         |
| UAS-zjp-RNAi                   | CG3533  | BDSC     | 36727      | 48         |
| UAS-zjp-RNAi                   | CG3533  | BDSC     | 38259      | 52         |
| UAS-Myo61F-RNAi                | CG9155  | VDRC     | 110682     | 101        |
| UAS-Myo61F-RNAi                | CG9155  | BDSC     | 41689      | 82         |
| UAS-Myo61F-RNAi                | CG9155  | VDRC     | 49345      | 45         |
| UAS-Actn-RNAi                  | CG4376  | BDSC     | 34874      | 98         |
| UAS-Actn-RNAi                  | CG4376  | VDRC     | 7762       | 22         |
| UAS-Actn-RNAi                  | CG4376  | VDRC     | 110719     | 49         |
| UAS-form3-RNAi                 | CG33556 | VDRC     | 45594      | 105        |
| UAS-form3-RNAi                 | CG33556 | VDRC     | 42302      | 92         |
| UAS-Marc11-RNAi                | CG3753  | VDRC     | 34701      | 55         |
| UAS-Marc11-RNAi                | CG3753  | BDSC     | 33709      | 64         |
| UAS-CG32105-RNAi               | CG32105 | VDRC     | 108747     | 113        |
| UAS-CG32105-RNAi               | CG32105 | VDRC     | 51269      | 87         |
| UAS-Cubn-RNAi                  | CG32702 | BDSC     | 51736      | 4          |
| UAS-Cubn-RNAi                  | CG32702 | BDSC     | 28702      | 4          |
| UAS-emp-RNAi                   | CG2727  | VDRC     | 12233      | 118        |
| UAS-emp-RNAi                   | CG2727  | BDSC     | 40947      | 40         |
| UAS-ND75-RNAi                  | CG2286  | BDSC     | 33910      | 30         |
| UAS-ND75-RNAi                  | CG2286  | BDSC     | 33911      | 53         |
| UAS-mgl-RNAi                   | CG42611 | BDSC     | 33940      | 73         |
| UAS-mgl-RNAi                   | CG42611 | VDRC     | 105071     | 71         |
| UAS-Amnionless-RNAi            | CG11592 | VDRC     | 104099     | 1          |
| UAS-Amnionless-RNAi            | CG11592 | BDSC     | 41956      | 3          |
